# Supplementary material for: Complement Activation in 22q11.2 Deletion Syndrome
Source: Springer Nature journal article supplement (doi:10.1007/s10875-020-00766-x), 2020-03-09
Supplement: 10875_2020_766_MOESM1_ESM.pdf [file 10875_2020_766_MOESM1_ESM.pdf]

Supplementary material

## **Complement Activation in 22q11.2 Deletion Syndrome**

Journal of Clinical Immunology

Dina Grinde<sup>1</sup>, Torstein Øverland<sup>2</sup>, Kari Lima<sup>2,3</sup>, Camilla Schjalm<sup>4</sup>, Tom Eirik Mollnes<sup>4,5,6</sup>  
and Tore G. Abrahamsen<sup>7,8</sup>

<sup>1</sup> Department of Pediatric Research, Oslo University Hospital, Oslo, Norway

<sup>2</sup> Department of Pediatric Medicine, Oslo University Hospital, Oslo, Norway

<sup>3</sup> Department of Endocrinology, Akershus University Hospital, Lørenskog, Norway

<sup>4</sup> Department of Immunology, Oslo University Hospital and University of Oslo, Norway

<sup>5</sup> Research Laboratory, Nordland Hospital, Bodø, and K.G. Jebsen TREC, University of Tromsø, Norway

<sup>6</sup> Centre of Molecular Inflammation Research, Norwegian University of Science and Technology, Trondheim, Norway

<sup>7</sup> Center for Rare Diseases, Division of Pediatric and Adolescent Medicine, Oslo University Hospital, Oslo, Norway

<sup>8</sup> Faculty of Medicine, University of Oslo, Oslo, Norway

Corresponding author:

Dina Grinde, Department of Pediatric Research, Oslo University Hospital, Oslo, Norway

E-mail: [dina.aresvik@rr-research.no](mailto:dina.aresvik@rr-research.no)

**Table S1** Immunological profile of patients with 22q11.2del

| Parameters                      | Age groups               |          |          |          |         |          |         |         |
|---------------------------------|--------------------------|----------|----------|----------|---------|----------|---------|---------|
|                                 | 2-5 mo                   | 5-9 mo   | 15-24 mo | 2-5 yr   | 5-10 yr | 10-16 yr | Adults  |         |
| Lymphocyte subpopulations       |                          |          |          |          |         |          |         |         |
| CD3 <sup>+</sup> <sup>b</sup>   | 22q11.2 del <sup>a</sup> | 1.6      | 2.2      | 1.8      | 1.4     | 1.3      | 1.1     | 1.1     |
|                                 | Ref.range <sup>h</sup>   | 3.4-12.2 | 1.8-18.7 | 1.4-12.1 | 1.4-5.5 | 1.2-4.7  | 1.4-4.2 | 1.2-4.1 |
| CD4 <sup>+</sup> <sup>b</sup>   | 22q11.2 del <sup>a</sup> | 1.2      | 1.4      | 1.0      | 0.8     | 0.7      | 0.5     | 0.6     |
|                                 | Ref.range <sup>h</sup>   | 1.6-6.5  | 1.0-7.2  | 0.4-7.2  | 0.5-2.7 | 0.4-2.5  | 0.4-2.1 | 0.5-2.0 |
| CD8 <sup>+</sup> T <sup>b</sup> | 22q11.2 del <sup>a</sup> | 0.3      | 0.7      | 0.5      | 0.5     | 0.4      | 0.5     | 0.4     |
|                                 | Ref.range <sup>h</sup>   | 0.3-3.4  | 0.2-5.4  | 0.2-2.8  | 0.2-1.8 | 0.2-1.7  | 0.3-1.3 | 0.2-1.2 |
| CD19 <sup>+</sup> <sup>b</sup>  | 22q11.2 del <sup>a</sup> | 1.13     | 1.45     | 2.18     | 1.05    | 0.45     | 0.31    | 0.19    |

|                                                                |                          |            |           |           |            |            |           |            |
|----------------------------------------------------------------|--------------------------|------------|-----------|-----------|------------|------------|-----------|------------|
|                                                                | Ref.range <sup>h</sup>   | 0.52-2.3   | 0.13-6.3  | 0.16-3.7  | 0.18-1.3   | 0.10-0.80  | 0.12-0.74 | 0.064-0.82 |
| CD16+/CD56+/CD3- NK <sup>b</sup>                               | 22q11.2 del <sup>a</sup> | 0.976      | 0.775     | 0.412     | 0.410      | 0.040      | 0.363     | 0.249      |
|                                                                | Ref.range <sup>h</sup>   | 0.097-1.99 | 0.068-3.9 | 0.055-4.0 | 0.061-0.51 | 0.070-0.59 | 0.092-1.2 | 0.10-1.2   |
| CD3+/CD4-/CD8-/TCR alfa/beta +<br>double negative <sup>c</sup> | 22q11.2 del <sup>a</sup> | 1.4        | 0.6       | 1.4       | 1.4        | 1.5        | 1.2       | 0.5        |
|                                                                | Ref.range <sup>h</sup>   | 0.18-3     | 0.39-4    | 0.55-4    | 1-7        | 0.77-6     | 0.54-6    | 0.57-5     |
| CD4+/CD45RO+ memory <sup>d</sup>                               | 22q11.2 del <sup>a</sup> | 25         | 29        | 33        | 38         | 45         | 63        | 50         |
|                                                                | Ref.range <sup>h</sup>   | 2-51       | 2-59      | 0.09-40   | 15-56      | 0.035-100  | 13-76     | 18-95      |
| CD4+/CD45RO+/CXCR5+ follicular-<br>like <sup>d</sup>           | 22q11.2 del <sup>a</sup> | 2          | 3         | 8         | 10         | 11         | 11        | 11         |
|                                                                | Ref.range <sup>h</sup>   | 7-33       | 9-47      | 8-51      | 6-72       | 7-85       | 7-47      | 5-56       |
| CD4+/CD45RA+ naïve <sup>d</sup>                                | 22q11.2 del <sup>a</sup> | 76         | 75        | 75        | 71         | 66         | 51        | 48         |
|                                                                | Ref.range <sup>h</sup>   | 73 – 100   | 77 – 97   | 56 – 100  | 52 – 92    | 46 – 99    | 37-97     | 16-100     |
| CD4+/CD45RA+/CD31+ recent thymic                               | 22q11.2 del <sup>a</sup> | 69         | 74        | 68        | 78         | 73         | 71        | 65         |

| emigrants <sup>e</sup>              | Ref.range <sup>h</sup>   | 64-94   | 65-90  | 40-100 | 37-100 | 41-81  | 31-81   | 7-100 |
|-------------------------------------|--------------------------|---------|--------|--------|--------|--------|---------|-------|
| CD4+/CD45RO+/CD127low/CD25+         | 22q11.2 del <sup>a</sup> | 6       | 4      | 7      | 6      | 6      | 6       | 5     |
| regulatory <sup>d</sup>             | Ref.range <sup>h</sup>   | 6-11    | 4-18   | 6-13   | 3-17   | 4-14   | 4-20    | 4-17  |
| CD8+/CD27+/CD28+ naïve <sup>f</sup> | 22q11.2 del <sup>a</sup> | 95      | 43     | 84     | 72     | 66     | 54      | 58    |
|                                     | Ref.range <sup>h</sup>   | 47-100  | 31-100 | 10-100 | 19-100 | 16-100 | 20-95   | 6-100 |
| CD8+/CD27+/CD28+ early              | 22q11.2 del <sup>a</sup> | 5       | 15     | 12     | 19     | 12     | 9       | 10    |
| effector/memory <sup>f</sup>        | Ref.range <sup>h</sup>   | 0.08-24 | 0.1-13 | 1-8    | 1-9    | 1-6    | 0.42-18 | 1-20  |
| CD8+/CD27-/CD28- late               | 22q11.2 del <sup>a</sup> | 0.20    | 16     | 0.48   | 4      | 15     | 35      | 25    |
| effector/memory <sup>f</sup>        | Ref.range <sup>h</sup>   | 0.47-70 | 1-100  | 2-100  | 10-55  | 5-100  | 4-100   | 14-98 |

mo, month; yr, years

<sup>a</sup> Values are expressed as median

<sup>b</sup> Absolute counts ( $\times 10^9/L$ )

<sup>c</sup> % of CD3+ T lymphocytes

<sup>d</sup> % of CD4+ T lymphocytes

<sup>e</sup> % of CD4+/CD45RA+ T lymphocytes

<sup>f</sup> % of CD8+ T lymphocytes

<sup>g</sup> g/L

<sup>h</sup> Reference range as reported by Schatorjé et al [1]

**Table S2** Correlations coefficients between C3bc, TCC and lymphocyte subpopulations in 22q11.2 deletion syndrome

| Parameters                                     | C3bc <sup>a</sup> |         | TCC <sup>a</sup> |         |
|------------------------------------------------|-------------------|---------|------------------|---------|
|                                                | r                 | p-value | r                | p-value |
| Lymphocyte subpopulations (n=52)               |                   |         |                  |         |
| CD3+ T lymphocytes                             | -0.173            | 0.220   | -0.059           | 0.677   |
| CD4+ T lymphocytes                             | -0.184            | 0.192   | -0.086           | 0.546   |
| CD8+ T lymphocytes                             | -0.086            | 0.543   | 0.046            | 0.747   |
| CD19+ B lymphocytes                            | 0.029             | 0.838   | -0.020           | 0.890   |
| CD16+/CD56+/CD3- NK cells                      | 0.009             | 0.950   | -0.015           | 0.914   |
| T lymphocytes subpopulations (n=39)            |                   |         |                  |         |
| CD3+/CD4-/CD8-/TCR alfa/beta + double negative | 0.111             | 0.500   | -0.098           | 0.553   |

|                                                     |        |        |        |       |
|-----------------------------------------------------|--------|--------|--------|-------|
| CD4+/CD45RO+ memory                                 | 0.207  | 0.205  | 0.189  | 0.250 |
| CD4+/CD45RO+/CXCR5+ follicular-like                 | 0.146  | 0.374  | -0.036 | 0.828 |
| CD4+/CD45RA+ naïve                                  | -0.350 | 0.029* | -0.071 | 0.668 |
| CD4+/CD45RA+/CD31+ recent thymic emigrants          | -0.098 | 0.552  | -0.017 | 0.918 |
| CD4+/CD45RO+/CD127 <sup>low</sup> /CD25+ regulatory | -0.054 | 0.742  | 0.111  | 0.501 |
| CD4+ naïve/memory ratio                             | -0.116 | 0.481  | -0.094 | 0.569 |
| CD8+/CD27+/CD28+ naïve                              | -0.087 | 0.601  | -0.018 | 0.914 |
| CD8+/CD27+/CD28+ early effector/memory              | -0.243 | 0.141  | -0.215 | 0.196 |
| CD8+/CD27-/CD28- late effector/memory               | 0.180  | 0.280  | 0.105  | 0.530 |

<sup>a</sup> Data are present as Spearman's rho correlation coefficients with corresponding p-values

\* p < 0.05

## References

1. Schatorje EJ, Gemen EF, Driessen GJ, Leuvenink J, van Hout RW, de Vries E. Paediatric reference values for the peripheral T cell compartment. *Scand J Immunol.* 2012;75(4):436-44. doi:10.1111/j.1365-3083.2012.02671.x.
